# Supplementary material for: The Effects of Sampling Depth on Benthic Testate Amoeba Assemblages in Freshwater Lakes: A Case Study in Lake Valdayskoe (the East European Plain)
Source: MDPI journal article supplement (doi:10.3390/d14110974), 2022-11-12
Supplement: s1 [file s1]

**Table S2.** The list of testate amoeba species, the number of counted shells and their proportion in four assemblages along the depth gradient in the Lake Valdayskoe

| Species                                                       | Littoral Assemblage (LA) |       | Sublittoral Assemblage (SA) |        | Bottom Slope Assemblage (BA) |       | Profundal Assamblage (PA) |       |
|---------------------------------------------------------------|--------------------------|-------|-----------------------------|--------|------------------------------|-------|---------------------------|-------|
|                                                               | # shells                 | %     | # shells                    | %      | # shells                     | %     | # shells                  | %     |
| <i>Arcella gibbosa</i> Penard, 1890                           | 7                        | 0,5%  |                             |        | 5                            | 0,2%  | 19                        | 0,4%  |
| <i>Arcella hemisphaerica</i> Perty, 1852                      | 47                       | 3,3%  | 3                           | 0,3%   | 28                           | 0,9%  | 100                       | 2,3%  |
| <i>Arcella rotundata</i> Playfair, 1918                       | 11                       | 0,8%  |                             |        | 3                            | 0,1%  | 7                         | 0,2%  |
| <i>Arcella vulgaris</i> Ehrenberg, 1830                       | 22                       | 1,5%  | 4                           | 0,4%   | 6                            | 0,2%  | 15                        | 0,4%  |
| <i>Centropyxis aculeata</i> (Ehrenberg, 1838)                 | 278                      | 19,5% | 14                          | 1,4%   | 8                            | 0,3%  | 43                        | 1,0%  |
| <i>Centropyxis aerophila</i> Deflandre, 1929                  | 7                        | 0,5%  | 14                          | 1,4%   | 34                           | 1,2%  | 65                        | 1,5%  |
| <i>Centropyxis cassis</i> (Wallich, 1864)                     | 41                       | 2,9%  | 68                          | 6,7%   | 207                          | 7,0%  | 404                       | 9,5%  |
| <i>Centropyxis cassis spinifera</i> Playfair, 1918            | 34                       | 2,4%  | 4                           | 0,4%   | 19                           | 0,6%  | 47                        | 1,1%  |
| <i>Centropyxis constricta</i> (Ehrenberg, 1841)               |                          |       |                             |        |                              |       | 2                         | 0,0%  |
| <i>Centropyxis discoides</i> (Penard, 1890)                   | 127                      | 8,9%  | 8                           | 0,8%   | 29                           | 1,0%  | 46                        | 1,1%  |
| <i>Centropyxis ecornis</i> (Ehrenberg, 1841)                  | 35                       | 2,5%  | 15                          | 1,5%   | 5                            | 0,2%  | 45                        | 1,1%  |
| <i>Centropyxis elongata</i> (Penard, 1890)                    | 2                        | 0,1%  | 3                           | 0,3%   |                              |       | 2                         | 0,0%  |
| <i>Centropyxis gibba</i> Deflandre, 1929                      | 17                       | 1,2%  | 2                           | 0,2%   | 1                            | 0,0%  | 16                        | 0,4%  |
| <i>Centropyxis hemisphaerica</i> (Barnard, 1875)              | 2                        | 0,1%  |                             |        |                              |       | 3                         | 0,1%  |
| <i>Centropyxis hirsuta</i> Deflandre, 1929                    | 4                        | 0,3%  | 3                           | 0,3%   |                              |       | 1                         | 0,0%  |
| <i>Centropyxis janetscheki</i> Laminger, 1971                 | 4                        | 0,3%  | 1                           | 0,1%   | 1                            | 0,0%  |                           |       |
| <i>Centropyxis laevigata</i> Penard, 1890                     | 32                       | 2,2%  | 16                          | 1,6%   | 15                           | 0,5%  | 25                        | 0,6%  |
| <i>Centropyxis marsupiformis</i> (Wallich, 1864)              |                          |       |                             |        |                              |       | 1                         | 0,0%  |
| <i>Centropyxis marsupiformis obesa</i> Deflandre, 1929        | 1                        | 0,1%  | 1                           | 0,1%   |                              |       | 3                         | 0,1%  |
| <i>Centropyxis minuta</i> Deflandre, 1929                     |                          |       | 1                           | 0,1%   | 2                            | 0,1%  | 1                         | 0,0%  |
| <i>Centropyxis orbicularis</i> Deflandre, 1929                | 1                        | 0,1%  |                             |        | 3                            | 0,1%  | 9                         | 0,2%  |
| <i>Centropyxis platystoma</i> (Penard, 1890)                  | 1                        | 0,1%  | 5                           | 0,5%   | 17                           | 0,6%  | 8                         | 0,2%  |
| <i>Cryptodifflugia angustatostoma</i> Beyens et Chardez, 1982 |                          |       |                             |        |                              |       | 2                         | 0,0%  |
| <i>Cryptodifflugia compressa</i> Penard, 1902                 |                          |       |                             |        |                              |       | 1                         | 0,0%  |
| <i>Cryptodifflugia psammophila</i> Golemansky, 1970           |                          |       |                             |        |                              |       | 2                         | 0,0%  |
| <i>Cryptodifflugia sacculus</i> Penard, 1902                  |                          |       |                             |        |                              |       | 2                         | 0,0%  |
| <i>Cryptodifflugia voigti</i> Schmidt, 1926                   |                          |       |                             |        | 1                            | 0,0%  | 2                         | 0,0%  |
| <i>Cyclopyxis eurystoma</i> Deflandre, 1929                   | 1                        | 0,1%  | 1                           | 0,1%   | 3                            | 0,1%  | 9                         | 0,2%  |
| <i>Cyclopyxis kahli</i> Deflandre, 1929                       | 9                        | 0,6%  | 9                           | 0,9%   | 10                           | 0,3%  | 16                        | 0,4%  |
| <i>Cyclopyxis penardi</i> (Penard, 1911)                      |                          |       | 1                           | 0,1%   |                              |       | 1                         | 0,0%  |
| <i>Cylindriifflugia acuminata</i> (Ehrenberg, 1838)           | 75                       | 5,3%  | 13                          | 1,3%   | 32                           | 1,1%  | 44                        | 1,0%  |
| <i>Cylindriifflugia elegans bicornis</i> (Jung, 1936)         | 55                       | 3,9%  | 122                         | 12,0 % | 365                          | 12,4% | 615                       | 14,4% |

|                                                                   |    |      |    |      |     |      |     |      |
|-------------------------------------------------------------------|----|------|----|------|-----|------|-----|------|
| <i>Cylindriflugia elegans lepida</i> (Schönborn, 1966)            | 6  | 0,4% | 6  | 0,6% | 31  | 1,1% | 31  | 0,7% |
| <i>Cylindriflugia elegans</i> (Penard, 1890)                      | 4  | 0,3% |    |      |     |      | 2   | 0,0% |
| <i>Cylindriflugia lanceolata</i> (Penard, 1890)                   | 54 | 3,8% | 1  | 0,1% | 52  | 1,8% | 59  | 1,4% |
| <i>Cyphoderia ampulla</i> (Ehrenberg, 1840)                       | 1  | 0,1% |    |      | 10  | 0,3% | 2   | 0,0% |
| <i>Cyphoderia calceolus</i> Penard, 1902                          |    |      |    |      |     |      | 1   | 0,0% |
| <i>Cyphoderia trochus amphoralis</i> Wailes et Penard, 1911       |    |      |    |      |     |      | 1   | 0,0% |
| <i>Diffflugia acutissima</i> Deflandre, 1931                      | 9  | 0,6% | 5  | 0,5% | 12  | 0,4% | 8   | 0,2% |
| <i>Diffflugia ampullula</i> Playfair, 1918                        | 19 | 1,3% | 14 | 1,4% | 22  | 0,7% | 44  | 1,0% |
| <i>Diffflugia angulostoma</i> Gauthier-Lièvre, Thomas, 1958       |    |      | 1  | 0,1% |     |      |     |      |
| <i>Diffflugia avellana</i> Penard, 1890                           | 2  | 0,1% | 7  | 0,7% | 1   | 0,0% | 2   | 0,0% |
| <i>Diffflugia bicornis</i> Penard, 1890                           |    |      |    |      |     |      | 4   | 0,1% |
| <i>Diffflugia bicruris</i> Gauthier-Lièvre, Thomas, 1958          | 2  | 0,1% |    |      |     |      |     |      |
| <i>Diffflugia brevicolla</i> Cash et Hopkinson, 1909              |    |      |    |      |     |      | 2   | 0,0% |
| <i>Diffflugia claviformis</i> Penard, 1899                        | 1  | 0,1% | 15 | 1,5% | 9   | 0,3% |     |      |
| <i>Diffflugia corona</i> Wallich, 1864                            | 8  | 0,6% | 1  | 0,1% |     |      | 1   | 0,0% |
| <i>Diffflugia curvicaulis</i> Penard, 1899                        | 3  | 0,2% | 5  | 0,5% | 12  | 0,4% | 12  | 0,3% |
| <i>Diffflugia cylindrus</i> (Thomas, 1953)                        | 1  | 0,1% |    |      |     |      |     |      |
| <i>Diffflugia difficilis</i> Thomas, 1954                         | 1  | 0,1% | 1  | 0,1% | 1   | 0,0% | 5   | 0,1% |
| <i>Diffflugia distenda</i> (Penard, 1899)                         | 1  | 0,1% | 4  | 0,4% | 4   | 0,1% | 8   | 0,2% |
| <i>Diffflugia dujardini</i> Chardez, 1957                         |    |      |    |      | 1   | 0,0% |     |      |
| <i>Diffflugia gassowskii</i> (Gassowsky, 1936)                    |    |      |    |      | 10  | 0,3% | 8   | 0,2% |
| <i>Diffflugia gigantea</i> (Chardez, 1967)                        | 5  | 0,4% | 2  | 0,2% |     |      |     |      |
| <i>Diffflugia giganteacuminata</i> (Chardez, 1958)                | 11 | 0,8% |    |      |     |      |     |      |
| <i>Diffflugia globulosa</i> Dujardin, 1837                        | 5  | 0,4% | 14 | 1,4% | 57  | 1,9% | 42  | 1,0% |
| <i>Diffflugia labiosa</i> Wailes, 1919                            | 6  | 0,4% | 1  | 0,1% | 3   | 0,1% |     |      |
| <i>Diffflugia lacustris</i> (Penard, 1899)                        | 49 | 3,4% | 6  | 0,6% | 7   | 0,2% | 9   | 0,2% |
| <i>Diffflugia lebes masurica</i> Schönborn, 1965                  | 1  | 0,1% | 2  | 0,2% |     |      |     |      |
| <i>Diffflugia lebes</i> Penard, 1893                              |    |      | 2  | 0,2% | 12  | 0,4% | 8   | 0,2% |
| <i>Diffflugia levanderi</i> Playfair, 1918                        |    |      |    |      | 3   | 0,1% | 5   | 0,1% |
| <i>Diffflugia limnetica</i> (Levander, 1900)                      | 6  | 0,4% | 1  | 0,1% | 1   | 0,0% | 10  | 0,2% |
| <i>Diffflugia linearis</i> (Penard, 1890)                         | 82 | 5,7% | 2  | 0,2% | 62  | 2,1% | 182 | 4,3% |
| <i>Diffflugia lingula regularis</i> Gauthier-Lièvre, Thomas, 1958 | 2  | 0,1% | 2  | 0,2% |     |      | 2   | 0,0% |
| <i>Diffflugia lithophila</i> (Penard, 1902)                       | 20 | 1,4% | 25 | 2,5% | 135 | 4,6% | 101 | 2,4% |
| <i>Diffflugia lobostoma</i> Leidy, 1879                           | 3  | 0,2% |    |      |     |      | 3   | 0,1% |
| <i>Diffflugia longicolis</i> (Gassowsky, 1936)                    | 6  | 0,4% | 34 | 3,3% | 94  | 3,2% | 79  | 1,8% |
| <i>Diffflugia lucida</i> Penard, 1890                             |    |      | 1  | 0,1% |     |      | 1   | 0,0% |
| <i>Diffflugia maxilabiosa</i> Chardez, 1985                       | 1  | 0,1% | 2  | 0,2% |     |      |     |      |
| <i>Diffflugia microclaviformis</i> (Kourova, 1925)                | 2  | 0,1% | 1  | 0,1% | 6   | 0,2% | 1   | 0,0% |
| <i>Diffflugia minuta</i> Rampi, 1950                              | 6  | 0,4% | 5  | 0,5% | 55  | 1,9% | 154 | 3,6% |

|                                                            |      |      |      |           |      |       |      |      |
|------------------------------------------------------------|------|------|------|-----------|------|-------|------|------|
| <i>Diffflugia oblonga</i> Ehrenberg, 1838                  | 68   | 4,8% | 133  | 13,1<br>% | 710  | 24,1% | 394  | 9,2% |
| <i>Diffflugia penardi</i> Hopkinson, 1909                  | 18   | 1,3% | 36   | 3,5%      | 213  | 7,2%  | 346  | 8,1% |
| <i>Diffflugia perfilievi</i> Gassowsky, 1936               |      |      |      |           | 2    | 0,1%  | 3    | 0,1% |
| <i>Diffflugia petricola</i> Cash, 1909                     | 27   | 1,9% | 176  | 17,3<br>% | 309  | 10,5% | 203  | 4,8% |
| <i>Diffflugia pristis</i> Penard, 1902                     | 6    | 0,4% | 9    | 0,9%      | 19   | 0,6%  | 119  | 2,8% |
| <i>Diffflugia pulex</i> Penard, 1902                       | 15   | 1,1% | 30   | 3,0%      | 113  | 3,8%  | 168  | 3,9% |
| <i>Diffflugia rubescens</i> Penard, 1891                   | 20   | 1,4% | 1    | 0,1%      | 1    | 0,0%  | 3    | 0,1% |
| <i>Diffflugia scalpellum</i> Penard, 1899                  | 2    | 0,1% |      |           |      |       | 1    | 0,0% |
| <i>Diffflugia sinuata</i> Gauthier-Lièvre,<br>Thomas, 1958 | 1    | 0,1% | 6    | 0,6%      |      |       |      |      |
| <i>Diffflugia urceolata</i> Carter, 1864                   | 3    | 0,2% | 22   | 2,2%      | 21   | 0,7%  | 5    | 0,1% |
| <i>Diffflugia ventricosa</i> Deflandre, 1926               | 2    | 0,1% | 8    | 0,8%      | 1    | 0,0%  |      |      |
| <i>Erugomicula bidens</i> (Penard, 1902)                   |      |      | 4    | 0,4%      | 1    | 0,0%  | 1    | 0,0% |
| <i>Galeripora discoides</i> (Ehrenberg, 1843)              | 75   | 5,3% |      |           | 22   | 0,7%  | 47   | 1,1% |
| <i>Galeripora megastoma</i> (Penard, 1902)                 | 7    | 0,5% |      |           | 2    | 0,1%  | 7    | 0,2% |
| <i>Golemanskia viscidula</i> (Penard, 1902)                | 5    | 0,4% | 25   | 2,5%      | 48   | 1,6%  | 13   | 0,3% |
| <i>Hyalosphenia elegans</i> Leidy, 1879                    | 4    | 0,3% |      |           |      |       | 2    | 0,0% |
| <i>Lagenodifflugia bryophila</i> (Penard,<br>1902)         |      |      |      |           |      |       | 1    | 0,0% |
| <i>Lesquereusia modesta</i> Rhumbler, 1895                 | 13   | 0,9% | 8    | 0,8%      | 2    | 0,1%  | 16   | 0,4% |
| <i>Nebela collaris</i> (Ehrenberg, 1848)                   |      |      |      |           | 1    | 0,0%  | 1    | 0,0% |
| <i>Nebela parvula</i> Cash, 1909                           |      |      |      |           |      |       | 1    | 0,0% |
| <i>Netzelia gramen</i> (Penard, 1902)                      | 6    | 0,4% | 15   | 1,5%      | 10   | 0,3%  | 267  | 6,3% |
| <i>Netzelia oviformis</i> (Cash, 1909)                     | 13   | 0,9% | 8    | 0,8%      | 33   | 1,1%  | 267  | 6,3% |
| <i>Oopyxis cyclostoma</i> Thomas, 1958                     |      |      |      |           |      |       | 1    | 0,0% |
| <i>Paraquadrula penardi</i> Deflandre, 1953                |      |      |      |           |      |       | 2    | 0,0% |
| <i>Pontigulasia compressoidea</i> Jung, 1942               | 5    | 0,4% | 18   | 1,8%      | 23   | 0,8%  | 11   | 0,3% |
| <i>Pontigulasia rhumbleri</i> Hopkinson,<br>1919           | 1    | 0,1% | 20   | 2,0%      | 6    | 0,2%  | 18   | 0,4% |
| <i>Pontigulasia spiralis</i> Rhumbler, 1896                | 1    | 0,1% | 7    | 0,7%      | 2    | 0,1%  | 1    | 0,0% |
| <i>Pseudodifflugia gracilis</i> Schlumberger,<br>1845      | 1    | 0,1% |      |           | 2    | 0,1%  | 4    | 0,1% |
| <i>Trigonopyxis arcula</i> (Leidy, 1879)                   |      |      |      |           | 1    | 0,0%  |      |      |
| <i>Zivkovicia spectabilis</i> (Penard, 1902)               | 5    | 0,4% | 22   | 2,2%      | 15   | 0,5%  | 27   | 0,6% |
| Total                                                      | 1428 | 100% | 1016 | 100%      | 2951 | 100%  | 4272 | 100% |
