# Supplementary material for: The Effects of Sampling Depth on Benthic Testate Amoeba Assemblages in Freshwater Lakes: A Case Study in Lake Valdayskoe (the East European Plain)
Source: MDPI journal article supplement (doi:10.3390/d14110974), 2022-11-12
Supplement: s1 [file s1]

**Table S1.** Characteristics of sampling sites along the depth gradient of Lake Valdayskoe

| Depth | Station/<br>sample # | pH  | Temperature,<br>°C | Plants                              | Sediments<br>color                                               | Sediment<br>substrate                       | Bottom<br>zone  | Water-<br>Column |
|-------|----------------------|-----|--------------------|-------------------------------------|------------------------------------------------------------------|---------------------------------------------|-----------------|------------------|
| 0     | 1,2,3                | 8,9 | 25,1               | Arrow leaf, water<br>lily, hornwort | Black                                                            | sand with deposit<br>of spring floods       | Littoral        | Epilimnion       |
| 3     | 4,5,6                | 8,4 | 22,1               | Arrow leaf, water<br>lily, hornwort | Black                                                            | sand with a little<br>amount of<br>sapropel |                 |                  |
| 6     | 7,8,9                | 8,4 | 20,8               | Arrow leaf, water<br>lily, hornwort | Black                                                            | sapropel with a<br>little amount of<br>sand |                 |                  |
| 9     | 10,11,12             | 8   | 7,9                | Absent                              | Dark-gray                                                        | sapropel                                    | Sub-Littoral    | Thermoclin       |
| 12    | 13,14,15             | 8   | 7,9                | Absent                              | Dark-gray                                                        | sapropel                                    | Bottom<br>Slope |                  |
| 15    | 16,17,18             | 8   | 7,1                | Absent                              | Brown-<br>olive with<br>dark-gray<br>and<br>orange<br>inclusions | sapropel                                    |                 |                  |
| 18    | 19,20,21             | 8   | 7                  | Absent                              | Dark-Gray                                                        | sapropel                                    |                 | Hypolimnion      |
| 21    | 22,23,24             | 7,9 | 6,8                | Absent                              | Dark-Gray                                                        | sapropel                                    |                 |                  |
| 24    | 24,26,27             | 7,9 | 6,5                | Absent                              | Dark-olive                                                       | sapropel                                    |                 |                  |
| 27    | 28,29,30             | 7,8 | 6,5                | Absent                              | Olive with<br>black and<br>orange<br>inclusions                  | sapropel                                    | Profundal       |                  |
| 30    | 31,32,33             | 7,9 | 6,4                | Absent                              | Olive with<br>black and<br>orange<br>inclusions                  | sapropel                                    |                 |                  |
| 33    | 34,35,36             | 7,9 | 6,2                | Absent                              | Dark-olive                                                       | sapropel                                    |                 |                  |
| 36    | 37,37,39             | 7,8 | 6,1                | Absent                              | Dark-olive                                                       | sapropel                                    |                 |                  |
| 39    | 40,41,42             | 7,8 | 6,1                | Absent                              | Dark-olive                                                       | sapropel                                    |                 |                  |
| 42    | 43,44,45             | 7,9 | 6,2                | Absent                              | Dark-olive                                                       | sapropel                                    |                 |                  |
| 45    | 46,47,48             | 7,9 | 6,1                | Absent                              | Black                                                            | sapropel                                    |                 |                  |
| 48    | 49,50,51             | 7,2 | 6                  | Absent                              | Olive-<br>black                                                  | sapropel                                    |                 |                  |
| 51    | 52,53,54             | 7,2 | 6                  | Absent                              | Olive-<br>black                                                  | sapropel                                    |                 |                  |
| 54    | 55,56,57             | 7,2 | 5,9                | Absent                              | Olive-<br>black                                                  | sapropel                                    |                 |                  |
| 57    | 50,59,60             | 7,2 | 5,9                | Absent                              | Olive-<br>black                                                  | sapropel                                    |                 |                  |
