# Supplementary material for: The Effects of Sampling Depth on Benthic Testate Amoeba Assemblages in Freshwater Lakes: A Case Study in Lake Valdayskoe (the East European Plain)
Source: MDPI journal article supplement (doi:10.3390/d14110974), 2022-11-12
Supplement: s1 [file s1]

**Table S4.** Relative abundance of genera in four assemblages along the depth gradient in the Lake Valdayskoe

| Genus                    | Littoral<br>Assemblage (LA) | Sub-Littoral<br>Assemblage (SA) | Bottom Slope<br>Assemblage (BA) | Profundal<br>Assemblage (PA) |
|--------------------------|-----------------------------|---------------------------------|---------------------------------|------------------------------|
| <i>Arcella</i>           | 7,40%                       | 0,70%                           | 1,40%                           | 3,30%                        |
| <i>Centropyxis</i>       | 41,00%                      | 15,30%                          | 11,60%                          | 16,90%                       |
| <i>Cryptodifflugia</i>   | 0,00%                       | 0,00%                           | 0,03%                           | 0,20%                        |
| <i>Cyclopyxis</i>        | 0,70%                       | 1,10%                           | 0,40%                           | 0,60%                        |
| <i>Cylindridifflugia</i> | 13,60%                      | 14,00%                          | 16,30%                          | 17,60%                       |
| <i>Cyphoderia</i>        | 0,10%                       | 0,00%                           | 0,30%                           | 0,10%                        |
| <i>Difflugia</i>         | 29,00%                      | 56,50%                          | 64,20%                          | 45,20%                       |
| <i>Erugomicula</i>       | 0,00%                       | 0,40%                           | 0,00%                           | 0,00%                        |
| <i>Galeripora</i>        | 4,50%                       | 0,00%                           | 0,80%                           | 1,30%                        |
| <i>Golemanskia</i>       | 0,40%                       | 2,50%                           | 1,60%                           | 0,30%                        |
| <i>Hyalosphenia</i>      | 0,30%                       | 0,00%                           | 0,00%                           | 0,00%                        |
| <i>Lagenodifflugia</i>   | 0,00%                       | 0,00%                           | 0,00%                           | 0,00%                        |
| <i>Lesquereusia</i>      | 0,90%                       | 0,80%                           | 0,10%                           | 0,40%                        |
| <i>Nebela</i>            | 0,00%                       | 0,00%                           | 0,03%                           | 0,00%                        |
| <i>Netzelia</i>          | 1,30%                       | 2,30%                           | 1,50%                           | 12,50%                       |
| <i>Oopyxis</i>           | 0,00%                       | 0,00%                           | 0,00%                           | 0,00%                        |
| <i>Paraquadrula</i>      | 0,00%                       | 0,00%                           | 0,00%                           | 0,00%                        |
| <i>Pontigulasia</i>      | 0,50%                       | 4,40%                           | 1,10%                           | 0,70%                        |
| <i>Pseudodifflugia</i>   | 0,10%                       | 0,00%                           | 0,10%                           | 0,10%                        |
| <i>Trigonopyxis</i>      | 0,00%                       | 0,00%                           | 0,03%                           | 0,00%                        |
| <i>Zivkovicia</i>        | 0,40%                       | 2,20%                           | 0,50%                           | 0,60%                        |
