# Supplementary material for: The Effects of Sampling Depth on Benthic Testate Amoeba Assemblages in Freshwater Lakes: A Case Study in Lake Valdayskoe (the East European Plain)
Source: MDPI journal article supplement (doi:10.3390/d14110974), 2022-11-12
Supplement: s1 [file s1]

**Table S3.** The occurrence of testate amoebae species in the samples and on the stations along the depth gradient

| Species                                | # of samples | Frequency of samples with specie | # of stations | Frequency of stations with species |
|----------------------------------------|--------------|----------------------------------|---------------|------------------------------------|
| <i>Cylindriflugia elegans</i>          | 60           | 100%                             | 20            | 100%                               |
| <i>Diffugia oblonga</i>                | 60           | 100%                             | 20            | 100%                               |
| <i>Centropyxis cassis</i>              | 59           | 98%                              | 20            | 100%                               |
| <i>Diffugia penardi</i>                | 56           | 93%                              | 19            | 95%                                |
| <i>Diffugia petricola</i>              | 56           | 93%                              | 19            | 95%                                |
| <i>Cylindriflugia acuminata</i>        | 53           | 88%                              | 20            | 100%                               |
| <i>Diffugia lithophila</i>             | 51           | 85%                              | 19            | 95%                                |
| <i>Diffugia minuta</i>                 | 47           | 78%                              | 20            | 100%                               |
| <i>Diffugia pulex</i>                  | 47           | 78%                              | 19            | 95%                                |
| <i>Netzelia oviformis</i>              | 47           | 78%                              | 19            | 95%                                |
| <i>Diffugia linearis</i>               | 46           | 77%                              | 18            | 90%                                |
| <i>Arcella hemisphaerica</i>           | 45           | 75%                              | 19            | 95%                                |
| <i>Diffugia longicolis</i>             | 45           | 75%                              | 18            | 90%                                |
| <i>Diffugia pristis</i>                | 42           | 70%                              | 18            | 90%                                |
| <i>Diffugia globulosa</i>              | 41           | 68%                              | 18            | 90%                                |
| <i>Centropyxis cassis spinifera</i>    | 40           | 67%                              | 19            | 95%                                |
| <i>Centropyxis discoides</i>           | 39           | 65%                              | 19            | 95%                                |
| <i>Centropyxis aerophila</i>           | 38           | 63%                              | 19            | 95%                                |
| <i>Cylindriflugia lanceolata</i>       | 37           | 62%                              | 13            | 65%                                |
| <i>Cylindriflugia elegans bicornis</i> | 36           | 60%                              | 19            | 95%                                |
| <i>Galeripora discoides</i>            | 35           | 58%                              | 16            | 80%                                |
| <i>Netzelia gramen</i>                 | 34           | 57%                              | 15            | 75%                                |
| <i>Centropyxis aculeata</i>            | 33           | 55%                              | 19            | 95%                                |
| <i>Centropyxis ecornis</i>             | 33           | 55%                              | 18            | 90%                                |
| <i>Golemanskia viscidula</i>           | 27           | 45%                              | 16            | 80%                                |
| <i>Zivkovicia spectabilis</i>          | 27           | 45%                              | 17            | 85%                                |
| <i>Cyclopyxis kahli</i>                | 26           | 43%                              | 16            | 80%                                |
| <i>Diffugia ampullula</i>              | 26           | 43%                              | 15            | 75%                                |
| <i>Lesquereusia modesta</i>            | 23           | 38%                              | 15            | 75%                                |
| <i>Arcella vulgaris</i>                | 22           | 37%                              | 15            | 75%                                |
| <i>Centropyxis laevigata</i>           | 22           | 37%                              | 14            | 70%                                |
| <i>Diffugia lacustris</i>              | 22           | 37%                              | 17            | 85%                                |
| <i>Pontigulasia compressoidea</i>      | 22           | 37%                              | 13            | 65%                                |
| <i>Centropyxis platystoma</i>          | 21           | 35%                              | 13            | 65%                                |
| <i>Diffugia urceolata</i>              | 21           | 35%                              | 10            | 50%                                |
| <i>Pontigulasia rhumbleri</i>          | 20           | 33%                              | 12            | 60%                                |
| <i>Arcella gibbosa</i>                 | 16           | 27%                              | 7             | 35%                                |
| <i>Centropyxis gibba</i>               | 16           | 27%                              | 10            | 50%                                |
| <i>Diffugia acutissima</i>             | 15           | 25%                              | 8             | 40%                                |
| <i>Diffugia curvicaulis</i>            | 14           | 23%                              | 11            | 55%                                |
| <i>Cyclopyxis eurystoma</i>            | 11           | 18%                              | 10            | 50%                                |

|                                        |    |     |   |     |
|----------------------------------------|----|-----|---|-----|
| <i>Diffugia claviformis</i>            | 11 | 18% | 6 | 30% |
| <i>Galeripora megastoma</i>            | 11 | 18% | 9 | 45% |
| <i>Arcella rotundata</i>               | 10 | 17% | 7 | 35% |
| <i>Cyphoderia ampulla</i>              | 10 | 17% | 5 | 25% |
| <i>Diffugia distenda</i>               | 9  | 15% | 9 | 45% |
| <i>Diffugia lebes</i>                  | 9  | 15% | 2 | 10% |
| <i>Diffugia avellana</i>               | 8  | 13% | 7 | 35% |
| <i>Diffugia limnetica</i>              | 8  | 13% | 7 | 35% |
| <i>Diffugia rubescens</i>              | 8  | 13% | 6 | 30% |
| <i>Centropyxis orbicularis</i>         | 7  | 12% | 6 | 30% |
| <i>Pontigulasia spiralis</i>           | 7  | 12% | 4 | 20% |
| <i>Centropyxis elongata</i>            | 6  | 10% | 6 | 30% |
| <i>Diffugia corona</i>                 | 6  | 10% | 4 | 20% |
| <i>Diffugia labiosa</i>                | 6  | 10% | 4 | 20% |
| <i>Diffugia microclaviformis</i>       | 6  | 10% | 5 | 25% |
| <i>Centropyxis janetscheki</i>         | 5  | 8%  | 4 | 20% |
| <i>Diffugia difficilis</i>             | 5  | 8%  | 5 | 25% |
| <i>Diffugia gassowskii</i>             | 5  | 8%  | 4 | 20% |
| <i>Centropyxis hirsuta</i>             | 4  | 7%  | 4 | 20% |
| <i>Diffugia levanderi</i>              | 4  | 7%  | 4 | 20% |
| <i>Diffugia lingula regularis</i>      | 4  | 7%  | 4 | 20% |
| <i>Diffugia lobostoma</i>              | 4  | 7%  | 3 | 15% |
| <i>Erugomicula bidens</i>              | 4  | 7%  | 3 | 15% |
| <i>Pseudodiffugia gracilis</i>         | 4  | 7%  | 4 | 20% |
| <i>Centropyxis hemisphaerica</i>       | 3  | 5%  | 3 | 15% |
| <i>Centropyxis marsupiformis obesa</i> | 3  | 5%  | 3 | 15% |
| <i>Centropyxis minuta</i>              | 3  | 5%  | 3 | 15% |
| <i>Cryptodiffugia voighti</i>          | 3  | 5%  | 3 | 15% |
| <i>Diffugia bicornis</i>               | 3  | 5%  | 3 | 15% |
| <i>Diffugia perfilievi</i>             | 3  | 5%  | 2 | 10% |
| <i>Diffugia sinuata</i>                | 3  | 5%  | 3 | 15% |
| <i>Diffugia ventricosa</i>             | 3  | 5%  | 3 | 15% |
| <i>Cyclopyxis penardi</i>              | 2  | 3%  | 2 | 10% |
| <i>Cylindridiffugia elegans lepida</i> | 2  | 3%  | 2 | 10% |
| <i>Diffugia gigantea</i>               | 2  | 3%  | 2 | 10% |
| <i>Diffugia lebes masurica</i>         | 2  | 3%  | 8 | 40% |
| <i>Diffugia lucida</i>                 | 2  | 3%  | 2 | 10% |
| <i>Diffugia maxilabiosa</i>            | 2  | 3%  | 2 | 10% |
| <i>Diffugia scalpellum</i>             | 2  | 3%  | 2 | 10% |
| <i>Hyalosphenia elegans</i>            | 2  | 3%  | 2 | 10% |
| <i>Nebela collaris</i>                 | 2  | 3%  | 2 | 10% |
| <i>Paraquadrula penardi</i>            | 2  | 3%  | 1 | 5%  |
| <i>Centropyxis constricta</i>          | 1  | 2%  | 1 | 5%  |
| <i>Centropyxis marsupiformis</i>       | 1  | 2%  | 1 | 5%  |
| <i>Cryptodiffugia angustatostoma</i>   | 1  | 2%  | 1 | 5%  |
| <i>Cryptodiffugia compressa</i>        | 1  | 2%  | 1 | 5%  |

|                                      |   |    |   |    |
|--------------------------------------|---|----|---|----|
| <i>Cryptodifflugia psammophila</i>   | 1 | 2% | 1 | 5% |
| <i>Cryptodifflugia sacculus</i>      | 1 | 2% | 1 | 5% |
| <i>Cyphoderia calceolus</i>          | 1 | 2% | 1 | 5% |
| <i>Cyphoderia trochus amphoralis</i> | 1 | 2% | 1 | 5% |
| <i>Difflugia angulostoma</i>         | 1 | 2% | 1 | 5% |
| <i>Difflugia bicruris</i>            | 1 | 2% | 1 | 5% |
| <i>Difflugia brevicolla</i>          | 1 | 2% | 1 | 5% |
| <i>Difflugia cylindrus</i>           | 1 | 2% | 1 | 5% |
| <i>Difflugia dujardini</i>           | 1 | 2% | 1 | 5% |
| <i>Difflugia giganteacuminata</i>    | 1 | 2% | 1 | 5% |
| <i>Lagenodifflugia bryophila</i>     | 1 | 2% | 1 | 5% |
| <i>Nebela parvula</i>                | 1 | 2% | 1 | 5% |
| <i>Oopyxis cyclostoma</i>            | 1 | 2% | 1 | 5% |
| <i>Trigonopyxis arcula</i>           | 1 | 2% | 1 | 5% |
